# Supplementary material
Source: Springer Nature journal article supplement (https://www.springermedizin.de/resource/supplementary/12884_2005_102_MOESM5_ESM.pdf/9459680)

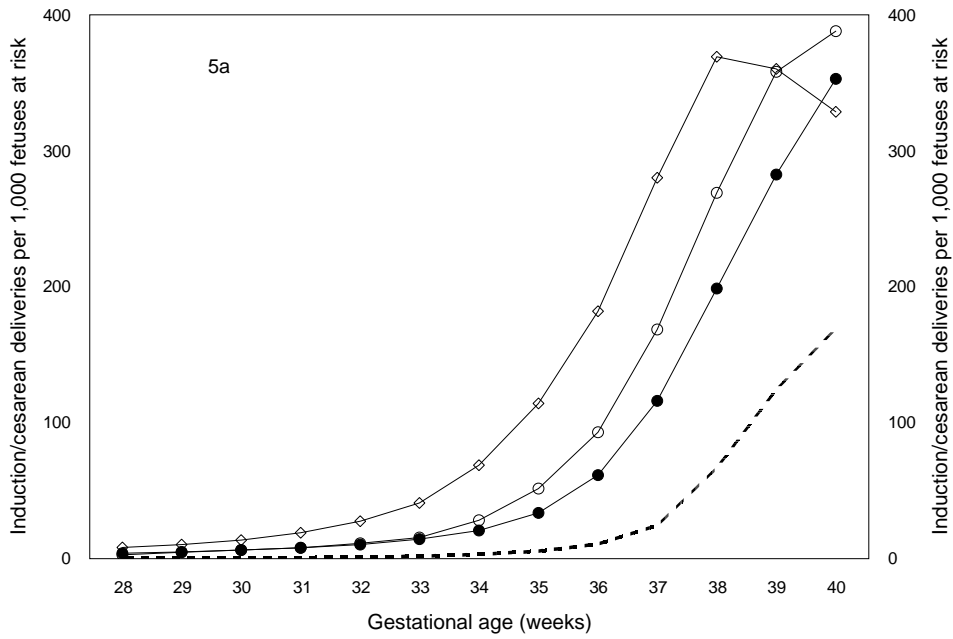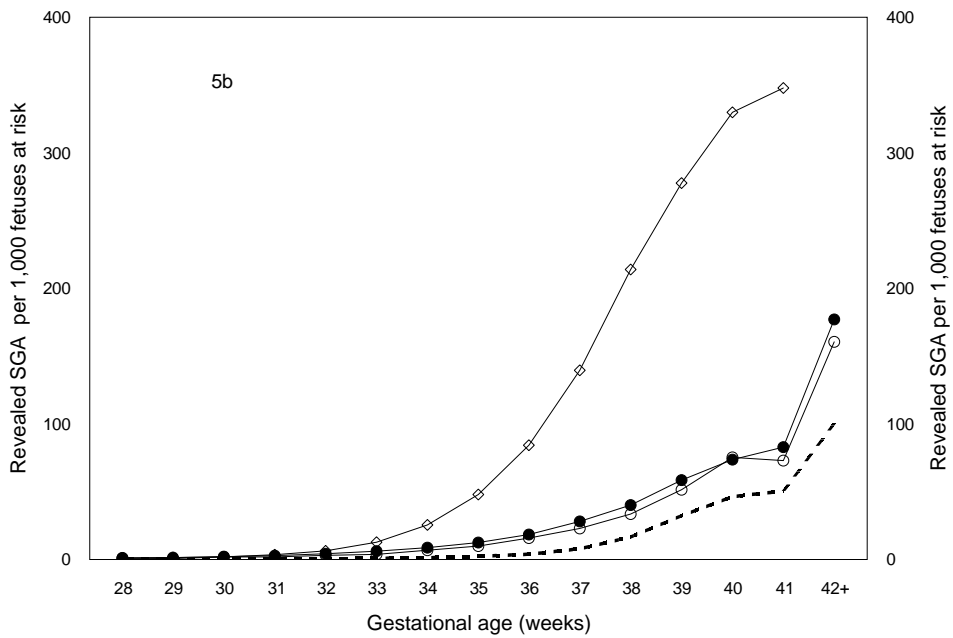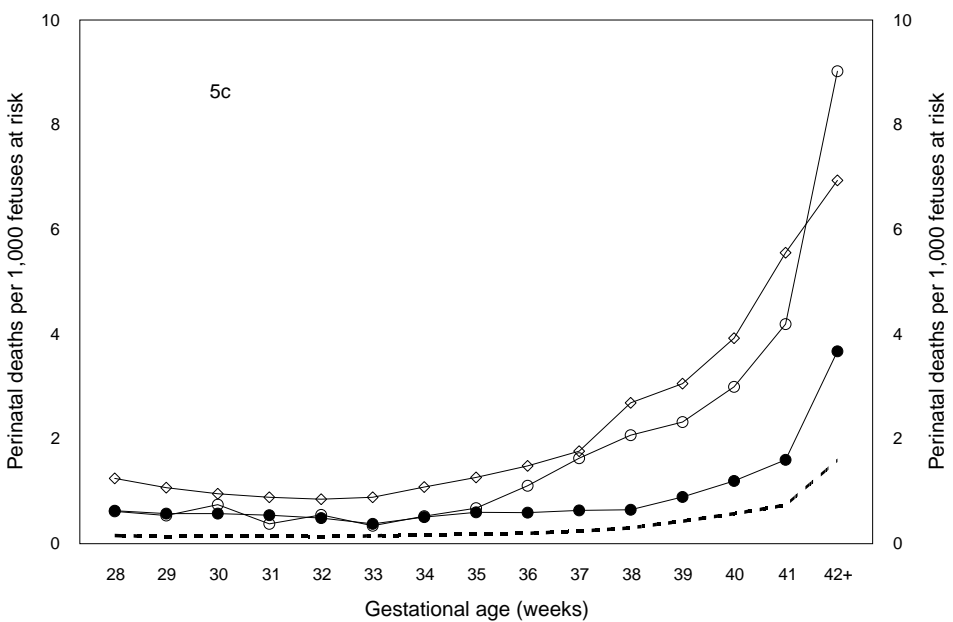

--- No medical risk factors    ● Hypertension    ○ Hypertension & diabetes    ◇ Twins

Supplement: MOESM5 [file 9459680]
